# Supplementary material for: A cost-effective method for the sensitive detection of levofloxacin using a 3D composite electrode composed of nail polish, graphite and aluminium oxide
Source: Royal Society of Chemistry journal article supplement (doi:10.1039/d4ay01231c), 2024-01-01
Supplement: d4ay01231c5.pdf [file d4ay01231c5.pdf]

1  
2 **A cost-effective method for the sensitive detection of levofloxacin using a 3D**  
3 **composite electrode composed of nail polish, graphite and aluminum oxide**  
4

5  
6  
7 Wallace Burger Veríssimo de Oliveira<sup>a\*</sup>, Gabriela Couto da Silva<sup>a</sup>, Raylla Santos Oliveira<sup>a</sup>,  
8 Pedro Henrique de Souza Leite Rocha<sup>a</sup>, Cassiano Cunha de Souza<sup>a</sup>, Maria Auxiliadora Costa  
9 Matos<sup>a</sup>, Thalles Pedrosa Lisboa<sup>b</sup>, and Renato Camargo Matos<sup>a#</sup>

10  
11  
12  
13 *<sup>a</sup>Department of Chemistry, Federal University of Juiz de Fora, 36026-900, Juiz de Fora-MG, Brazil*  
14

15 *<sup>b</sup>Universidade Federal da Grande Dourados, Faculdade de Ciências Exatas e Tecnologia, Dourados-MS,*  
16 *Brazil, 79804-970*

17  
18  
19 **Supplementary Information**  
20

21  
22 *Corresponding author: \* [wallacemnj@gmail.com](mailto:wallacemnj@gmail.com); # [renato.matos@ufjf.br](mailto:renato.matos@ufjf.br)*  
23

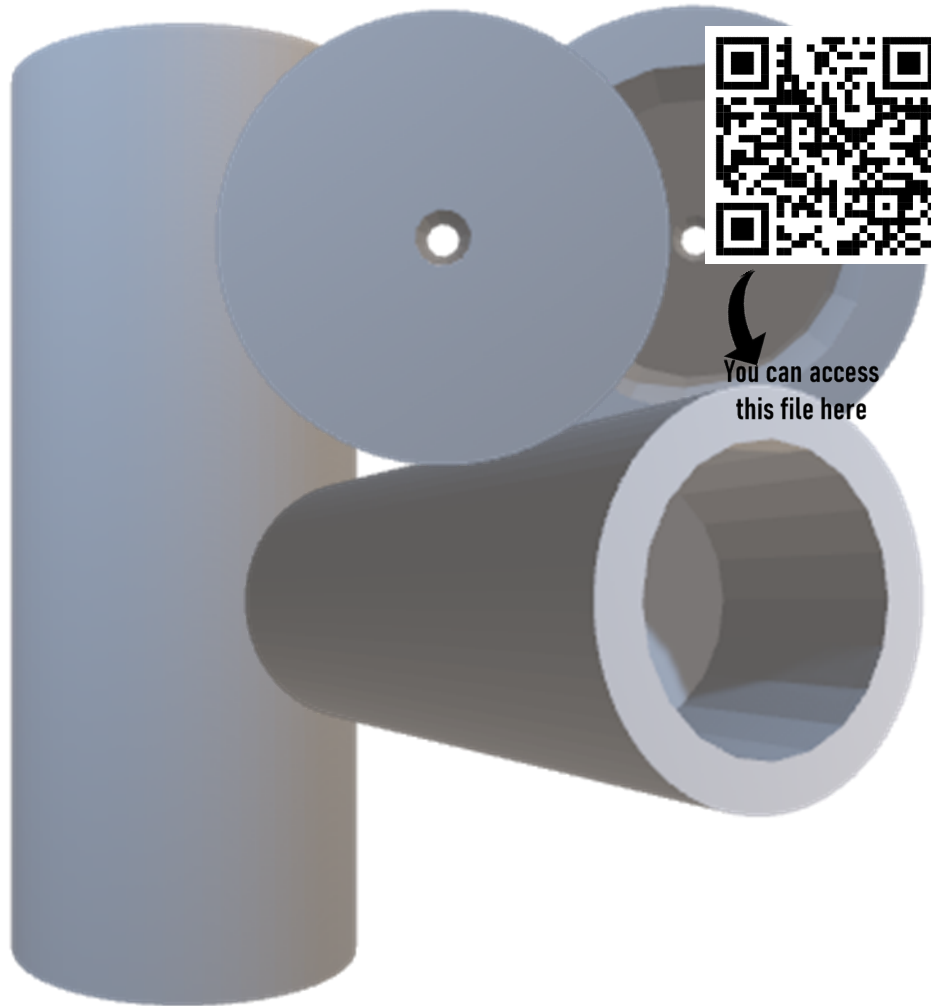

24

25 **Fig. S1:** 3D model (.stl) of the printed support used in the construction of the electrochemical  
26 sensor.

27 Available at: <https://drive.google.com/file/d/1hLLzohlYhEIYAYqcwCt5Fo6Y-CUdyHvO/view?usp=sharing>.

28

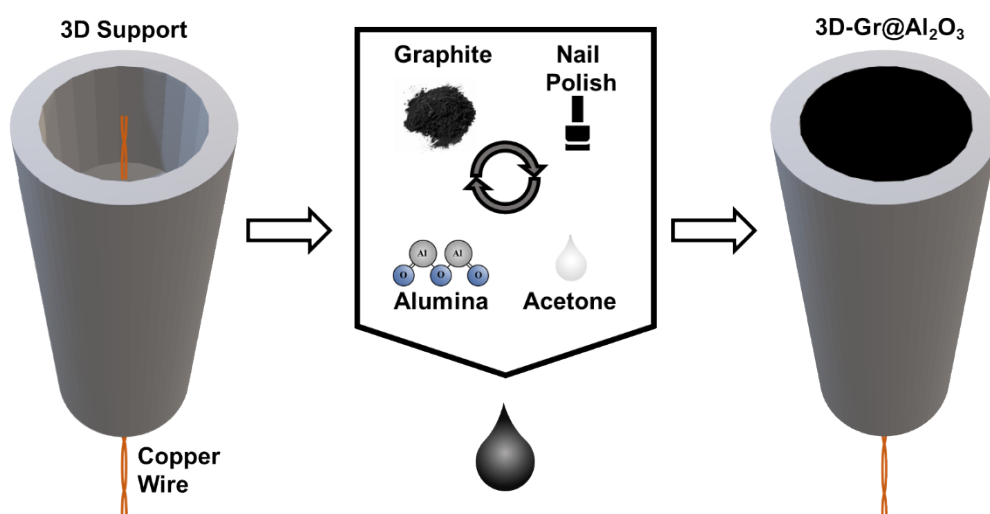

29

30 **Fig. S2:** Illustrated diagram showing the construction of the proposed 3D-Gr@Al<sub>2</sub>O<sub>3</sub> sensor,  
 31 including the insertion of the conductive cable into the printed support, the composition of the  
 32 composite material, and its immobilization within the support.

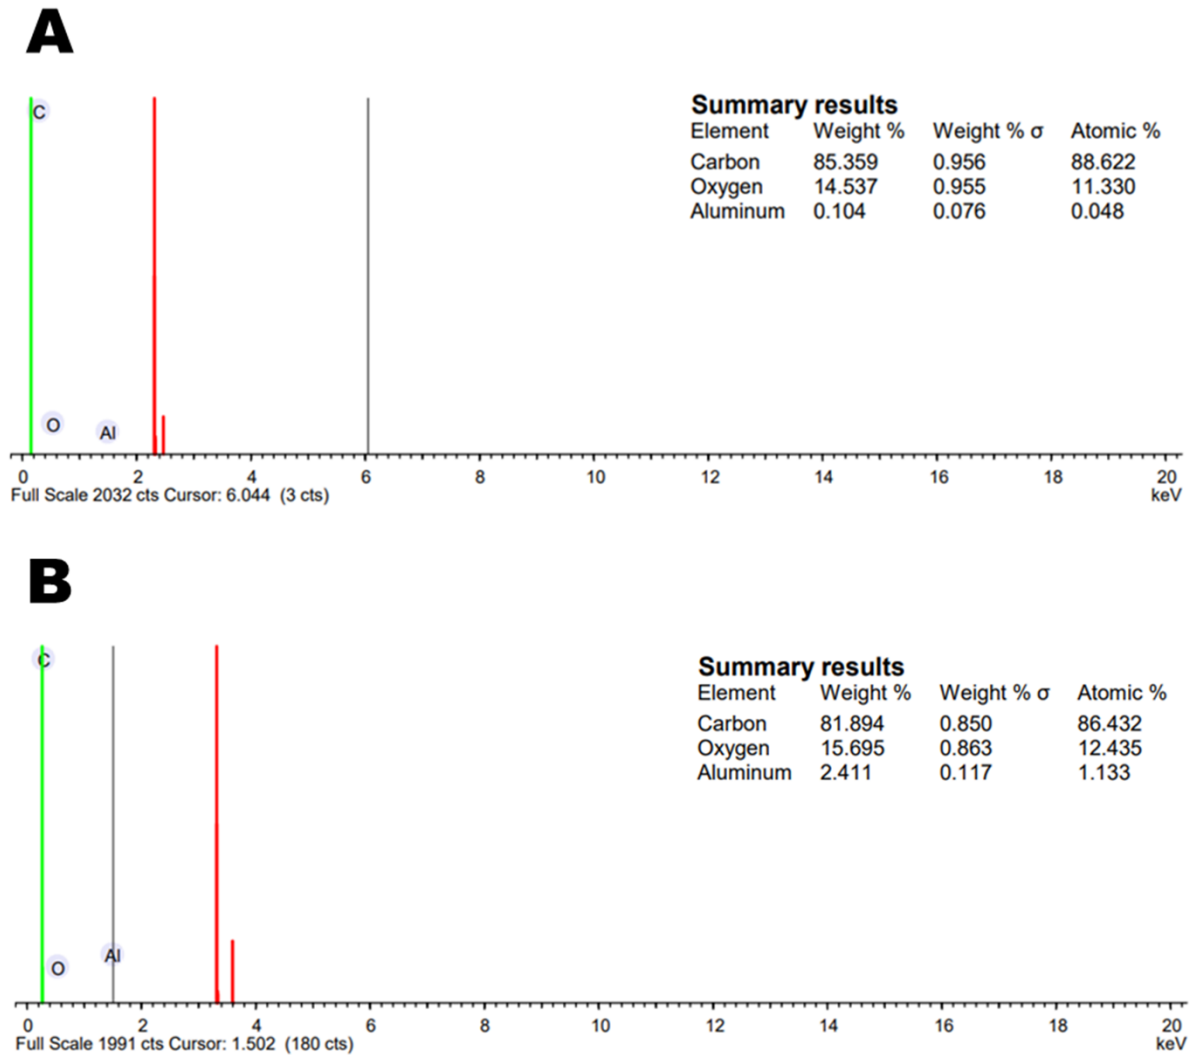

33

34 **Fig. S3:** EDX analysis of sensors with (A) 0% e (B) 5% (m/m) of Al<sub>2</sub>O<sub>3</sub> in your composition.

35 Analysis condition: Acquisition time 10 s, accelerating voltage 15 kV, process time 5 s.

36

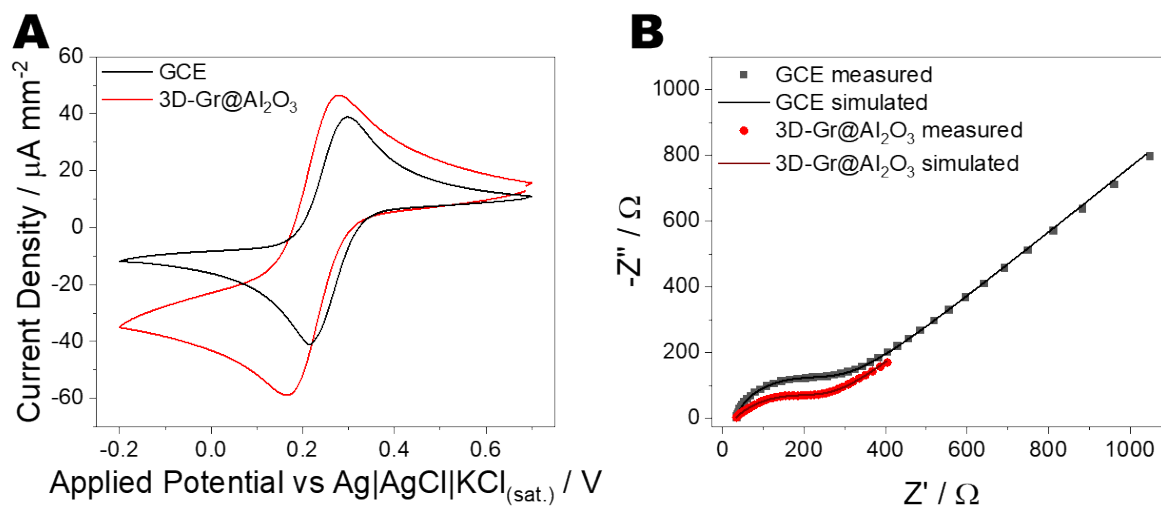

37

38 **Fig. S4:** (A) CV voltammograms and (B) Nyquist diagrams of 3D-Gr@Al<sub>2</sub>O<sub>3</sub> (RED Line) and  
 39 GCE (Black Line) in 2.5 mmol L<sup>-1</sup> potassium ferricyanide/ferrocyanide in KCl medium 100 mmol  
 40 L<sup>-1</sup>. CV scan rate 0.1 V. EIS Conditions: applied potential of 0.224 V, 10 mV of amplitude, and  
 41 the frequency region ranging from 10,000 to 0.1 Hz.

42
