# Supplementary figures and images for: A cost-effective method for the sensitive detection of levofloxacin using a 3D composite electrode composed of nail polish, graphite and aluminium oxide
Source: Royal Society of Chemistry journal article supplement (doi:10.1039/d4ay01231c), 2024-01-01

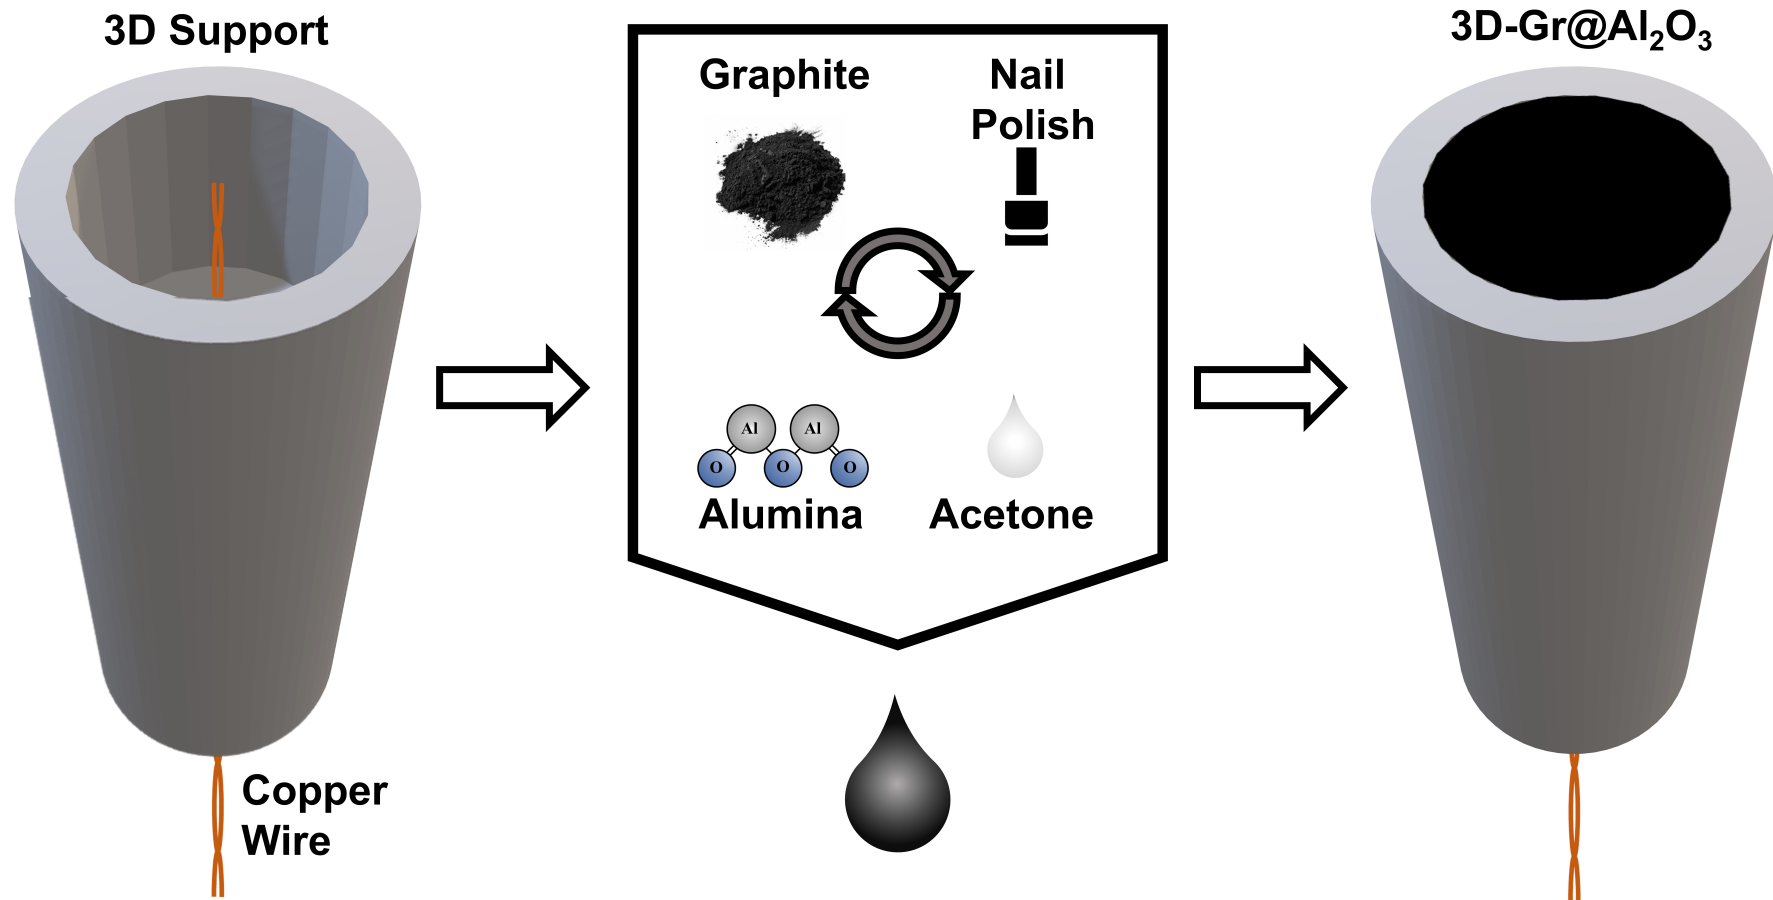

Supplement: d4ay01231c2.pdf [file d4ay01231c2.pdf]

**A**

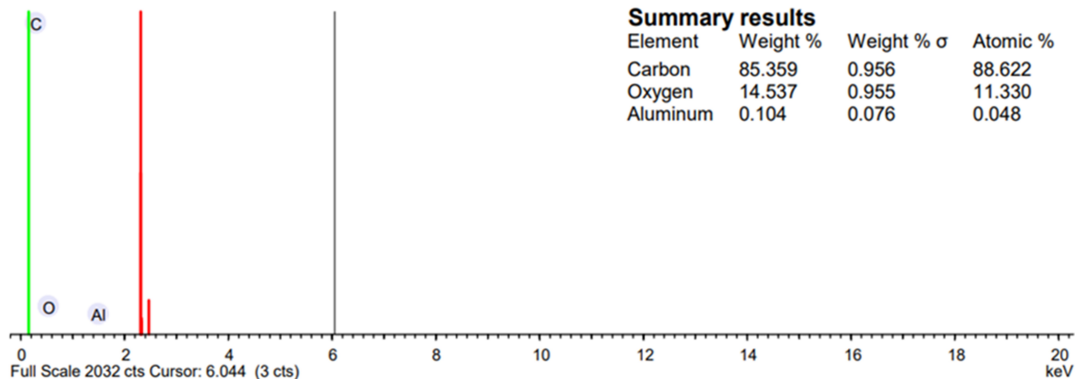

**B**

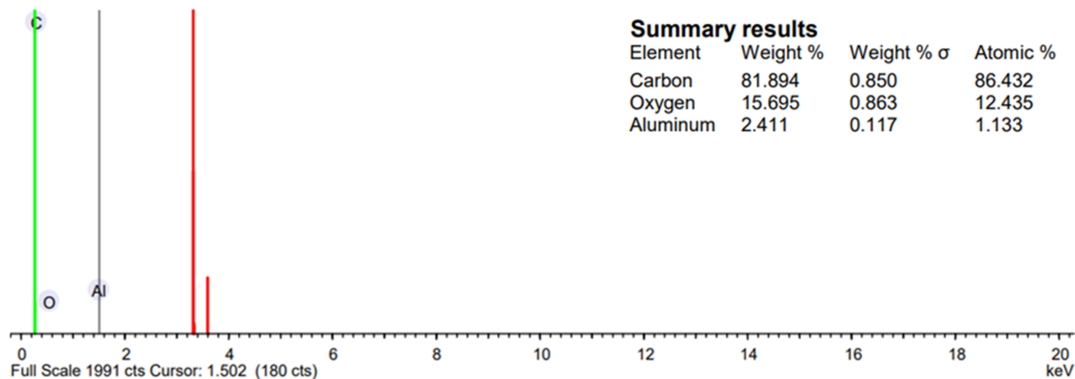

Supplement: d4ay01231c3.pdf [file d4ay01231c3.pdf]

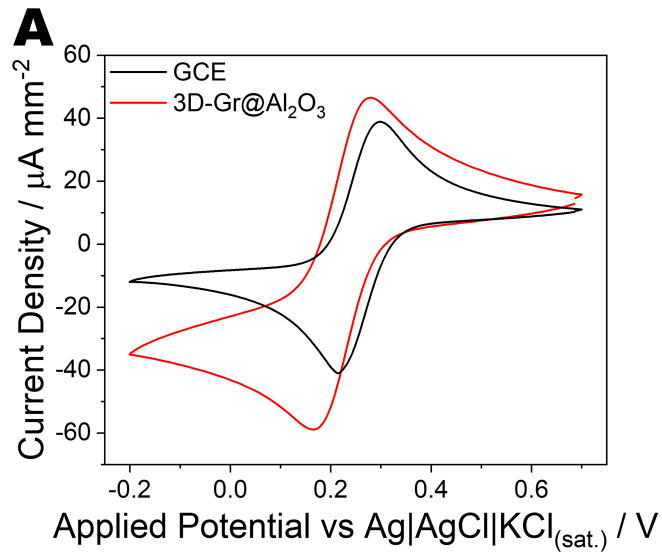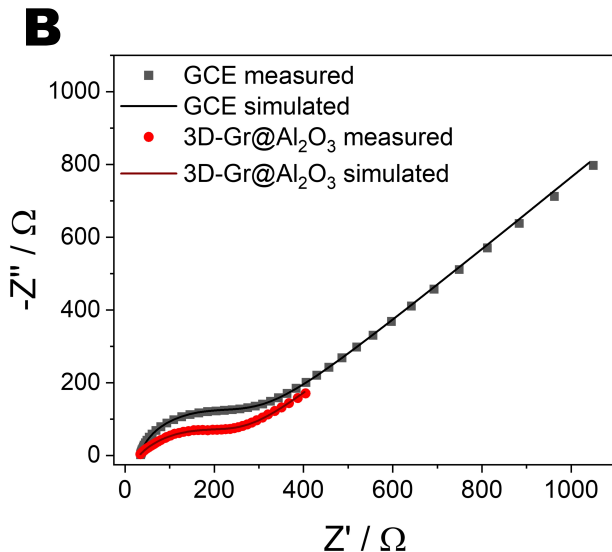

Supplement: d4ay01231c4.pdf [file d4ay01231c4.pdf]
